# Supplementary material for: Application of Shrimp Waste for the Synthesis of Polyurethane–Chitosan Materials with Potential Use in Sorption of Oil Micro-Spills in Water Treatment
Source: MDPI journal article supplement (doi:10.3390/su13095098), 2021-05-01
Supplement: s1 [file s1]

## Supplementary Materials

Application of shrimp waste for the synthesis of polyurethane–chitosan materials with potential use in sorption of oil micro-spills in water treatment

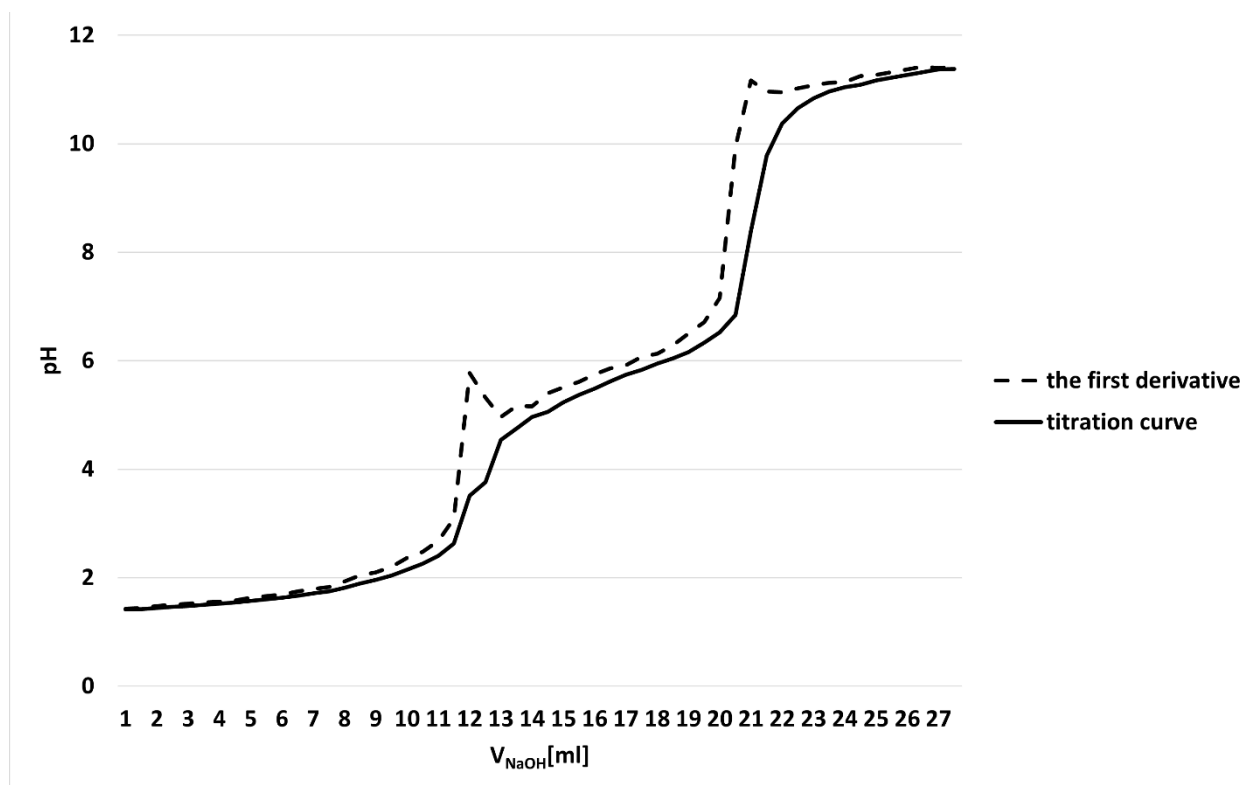

**Figure S1.** An example of a titration curve and it is the first derivative in determining DD of Ch

**Table S1.** Estimating the weights of individual factors that make up the strengths

| No. | Strengths                                                                                                       | Binary comparison <sup>a</sup>        | Summary assessment <sup>b</sup> | Weight of the factor <sup>c</sup> |
|-----|-----------------------------------------------------------------------------------------------------------------|---------------------------------------|---------------------------------|-----------------------------------|
| 1.  | Innovative value of the new products                                                                            | <u>1</u> 1 1 1<br>2 <u>3</u> <u>4</u> | 1                               | 0.10                              |
| 2.  | Potential susceptibility of the studied materials for biodegradation in the natural environment after their use | <u>2</u> <u>2</u> <u>2</u><br>3 4     | 4                               | 0.40                              |
| 3.  | The use of new products in a circular economy                                                                   | <u>3</u> <u>3</u><br>4                | 3                               | 0.30                              |
| 4.  | The new products signs in the Green Deal strategy                                                               | <u>4</u>                              | 2                               | 0.20                              |
|     |                                                                                                                 |                                       | 10                              | 1.00                              |

<sup>a</sup> the factor considered more important in each pair compared was bolded and underlined

<sup>b</sup> each number means how many times a given factor has been considered more important

<sup>c</sup> the weight of a factor is the quotient of its total score and the sum of all sum score factors

**Table S2.** Estimating the weights of individual factors that make up the opportunities

| No. | Opportunities                                                                                                 | Binary comparison <sup>a</sup>      | Summary assessment <sup>b</sup> | Weight of the factor <sup>c</sup> |
|-----|---------------------------------------------------------------------------------------------------------------|-------------------------------------|---------------------------------|-----------------------------------|
| 1.  | Actions for a sustainable economy in the EU                                                                   | <u>1</u> 1 1 <u>1</u><br>2 3 4 5    | 3                               | 0.20                              |
| 2.  | Legal regulations encourage to research new, innovative and proecological products                            | <u>2</u> <u>2</u> <u>2</u><br>3 4 5 | 4                               | 0.27                              |
| 3.  | Actions for elimination of petroleum pollutants in water treatment                                            | <u>3</u> <u>3</u> <u>3</u><br>4 5   | 5                               | 0.33                              |
| 4.  | The possibility of obtaining external sources of financing for the studied materials                          | <u>4</u><br>5                       | 2                               | 0.13                              |
| 5.  | Strong proecological social movements favoring all activities (producers) related to environmental protection | <u>5</u>                            | 1                               | 0.07                              |
|     |                                                                                                               |                                     | 15                              | 1.00                              |

<sup>a</sup> the factor considered more important in each pair compared was bolded and underlined

<sup>b</sup> each number means how many times a given factor has been considered more important

<sup>c</sup> the weight of a factor is the quotient of its total score and the sum of all sum score factors

**Table S3.** Estimating the weights of individual factors that make up the weaknesses

| No. | Weaknesses                                                              | Binary comparison <sup>a</sup> | Summary assessment <sup>b</sup> | Weight of the factor <sup>c</sup> |
|-----|-------------------------------------------------------------------------|--------------------------------|---------------------------------|-----------------------------------|
| 1.  | Low efficiency of the chitosan production process on a laboratory scale | <u>1</u><br>2                  | 2                               | 0.70                              |
| 2.  | Initial stage of work on the tested new product                         | <u>2</u>                       | 1                               | 0.30                              |
|     |                                                                         |                                | 3                               | 1.00                              |

<sup>a</sup> the factor considered more important in each pair compared was bolded and underlined

<sup>b</sup> each number means how many times a given factor has been considered more important

<sup>c</sup> the weight of a factor is the quotient of its total score and the sum of all sum score factors

**Table S4.** Estimating the weights of individual factors that make up the threats

| No. | Threats                                                              | Binary comparison <sup>a</sup> | Summary assessment <sup>b</sup> | Weight of the factor <sup>c</sup> |
|-----|----------------------------------------------------------------------|--------------------------------|---------------------------------|-----------------------------------|
| 1.  | Competition of companies producing materials with similar properties | <u>1</u> 1<br><u>2</u>         | 1                               | 0.30                              |
| 2.  | Global economic interests of industry sectors                        | <u>2</u>                       | 2                               | 0.70                              |
|     |                                                                      |                                | 3                               | 1.00                              |

<sup>a</sup> the factor considered more important in each pair compared was bolded and underlined

<sup>b</sup> each number means how many times a given factor has been considered more important

<sup>c</sup> the weight of a factor is the quotient of its total score and the sum of all sum score factors
